# Supplementary material
Source: ML conference proceedings conference paper supplement (https://proceedings.neurips.cc/paper_files/paper/2022/hash/c383e44d9a878d1982d9abb838bd5d8a-Abstract.html)
Supplement: Supplementary file 1 [file c383e44d9a878d1982d9abb838bd5d8a-Supplemental-Conference.pdf]

Table 1: Comparing with channel pruning. Speedups for HRank[11] are inferred from its theoretical FLOPs reduction.

| Network   | Sparsity ratio | Accuracy | Speedup |
|-----------|----------------|----------|---------|
| Baseline  | Dense          | 76.12    | 1×      |
| HRank[11] | 37%            | 74.98    | 1.77×   |
| OVW       | 50%            | 75.76    | 1.86×   |
| HRank[11] | 46%            | 71.98    | 2.63×   |
| OVW       | 70%            | 73.35    | 2.79×   |

Table 2: Comparing speedup with different vector lengths.

| Resnet50 layer |     | 64          | 32          | 16   |
|----------------|-----|-------------|-------------|------|
| Conv0          | 50% | <b>1.51</b> | 1.27        | 1.12 |
|                | 90% | 2.14        | <b>2.76</b> | 1.93 |
| Conv11         | 50% | <b>2.23</b> | 1.73        | 0.33 |
|                | 90% | <b>7.75</b> | 6.62        | 1.38 |
| Conv41         | 50% | <b>1.62</b> | 0.76        | 0.31 |
|                | 90% | <b>7.93</b> | 3.72        | 1.53 |

## 1 A Appendix

### 2 A.1 Ablation Study

3 Table 1 shows the accuracy of our method compared to advanced channel pruning methods, HRank  
 4 [11]. Channel pruning requires specialized training from scratch methods to recover its enormous  
 5 accuracy drop. The OVW pattern demonstrates a better accuracy-speed tradeoff against it.

6 Table 2 supports our arguments for V that only vector lengths as large as 32 or 64 can minimize  
 7 convolution kernel runtime.

8 Table 2 justified our system is robust on different types of GPU as long as its architecture supports  
 9 optimization for the implicit GEMM convolution algorithm.

## 10 References

- 11 [1] MegEngine: A fast, scalable and easy-to-use deep learning framework. 2020.
- 12 [2] *Cao Shijie, Zhang Chen, Yao Zhuliang, Xiao Wencong, Nie Lanshun, Zhan Dechen, Liu*  
 13 *Yunxin, Wu Ming, Zhang Lintao*. Efficient and effective sparse LSTM on FPGA with bank-  
 14 balanced sparsity // Proceedings of the 2019 ACM/SIGDA International Symposium on  
 15 Field-Programmable Gate Arrays. 2019. 63–72.

Table 3: Comparing speedup on RTX 3070.

| Resnet50 layer |     | V100 |      | RTX 3070 |      |
|----------------|-----|------|------|----------|------|
|                |     | V=64 | V=32 | V=64     | V=32 |
| Conv11         | 50% | 2.23 | 1.73 | 1.71     | 1.55 |
|                | 90% | 7.75 | 6.62 | 6.71     | 6.39 |
| Conv41         | 50% | 1.62 | 0.76 | 1.30     | 0.68 |
|                | 90% | 7.93 | 3.72 | 6.30     | 3.31 |

- 16 [3] *Gale Trevor, Zaharia Matei, Young Cliff, Elsen Erich*. Sparse gpu kernels for deep learning //  
17 SC20: International Conference for High Performance Computing, Networking, Storage and  
18 Analysis. 2020. 1–14.
- 19 [4] *Gray Scott, Radford Alec, Kingma Diederik P*. Gpu kernels for block-sparse weights // arXiv  
20 preprint arXiv:1711.09224. 2017. 3. 2.
- 21 [5] *Guo Cong, Hsueh Bo Yang, Leng Jingwen, Qiu Yuxian, Guan Yue, Wang Zehuan, Jia Xiaoying,*  
22 *Li Xipeng, Guo Minyi, Zhu Yuhao*. Accelerating sparse dnn models without hardware-support  
23 via tile-wise sparsity // SC20: International Conference for High Performance Computing,  
24 Networking, Storage and Analysis. 2020. 1–15.
- 25 [6] *Han Song, Mao Huizi, Dally William J*. Deep compression: Compressing deep neural networks  
26 with pruning, trained quantization and huffman coding // arXiv preprint arXiv:1510.00149.  
27 2015.
- 28 [7] *Han Song, Pool Jeff, Tran John, Dally William*. Learning both weights and connections for  
29 efficient neural network // Advances in neural information processing systems. 2015. 28.
- 30 [8] *He Kaiming, Zhang Xiangyu, Ren Shaoqing, Sun Jian*. Deep residual learning for image  
31 recognition // Proceedings of the IEEE conference on computer vision and pattern recognition.  
32 2016. 770–778.
- 33 [9] *Huang Guyue, Li Haoran, Qin Minghai, Sun Fei, Din Yufei, Xie Yuan*. Shfl-BW: Accelerating  
34 Deep Neural Network Inference with Tensor-Core Aware Weight Pruning // arXiv preprint  
35 arXiv:2203.05016. 2022.
- 36 [10] *Li Hao, Kadav Asim, Durdanovic Igor, Samet Hanan, Graf Hans Peter*. Pruning filters for  
37 efficient convnets // arXiv preprint arXiv:1608.08710. 2016.
- 38 [11] *Lin Mingbao, Ji Rongrong, Wang Yan, Zhang Yichen, Zhang Baochang, Tian Yonghong, Shao*  
39 *Ling*. Hrank: Filter pruning using high-rank feature map // Proceedings of the IEEE/CVF  
40 conference on computer vision and pattern recognition. 2020. 1529–1538.
- 41 [12] *Liu Zhuang, Sun Mingjie, Zhou Tinghui, Huang Gao, Darrell Trevor*. Rethinking the value of  
42 network pruning // arXiv preprint arXiv:1810.05270. 2018.
- 43 [13] *Ma Xiaolong, Qin Minghai, Sun Fei, Hou Zejiang, Yuan Kun, Xu Yi, Wang Yanzhi, Chen Yen-*  
44 *Kuang, Jin Rong, Xie Yuan*. Effective Model Sparsification by Scheduled Grow-and-Prune  
45 Methods // arXiv preprint arXiv:2106.09857. 2021.
- 46 [14] *Malinen Mikko I, Fränti Pasi*. Balanced k-means for clustering // Joint iapr international  
47 workshops on statistical techniques in pattern recognition (spr) and structural and syntactic  
48 pattern recognition (sspr). 2014. 32–41.
- 49 [15] *Mishra Asit, Latorre Jorge Albericio, Pool Jeff, Stosic Darko, Stosic Dusan, Venkatesh Ganesh,*  
50 *Yu Chong, Micikevicius Paulius*. Accelerating sparse deep neural networks // arXiv preprint  
51 arXiv:2104.08378. 2021.
- 52 [16] *Pool Jeff, Yu Chong*. Channel Permutations for N: M Sparsity // Advances in Neural Information  
53 Processing Systems. 2021. 34.
- 54 [17] *Sui Yang, Yin Miao, Xie Yi, Phan Huy, Aliari Zonouz Saman, Yuan Bo*. CHIP: CHannel  
55 Independence-based Pruning for Compact Neural Networks // Advances in Neural Information  
56 Processing Systems. 2021. 34.
- 57 [18] *Wen Wei, Wu Chunpeng, Wang Yandan, Chen Yiran, Li Hai*. Learning structured sparsity in  
58 deep neural networks // Advances in neural information processing systems. 2016. 29.

- 59 [19] *Zhang Xiang, Zhao Junbo, LeCun Yann*. Character-level convolutional networks for text  
60 classification // *Advances in neural information processing systems*. 2015. 28.
- 61 [20] *Zhou Aojun, Ma Yukun, Zhu Junnan, Liu Jianbo, Zhang Zhijie, Yuan Kun, Sun Wenxiu, Li Hong-*  
62 *sheng*. Learning n: m fine-grained structured sparse neural networks from scratch // *arXiv*  
63 *preprint arXiv:2102.04010*. 2021.
- 64 [21] *Zhou Yangjie, Yang Mengtian, Guo Cong, Leng Jingwen, Liang Yun, Chen Quan, Guo Minyi, Zhu*  
65 *Yuhao*. Characterizing and Demystifying the Implicit Convolution Algorithm on Commercial  
66 Matrix-Multiplication Accelerators // *2021 IEEE International Symposium on Workload*  
67 *Characterization (IISWC)*. 2021. 214–225.
- 68 [22] *Zhu Maohua, Zhang Tao, Gu Zhenyu, Xie Yuan*. Sparse tensor core: Algorithm and hardware  
69 co-design for vector-wise sparse neural networks on modern gpus // *Proceedings of the 52nd*  
70 *Annual IEEE/ACM International Symposium on Microarchitecture*. 2019. 359–371.
